# Supplementary material for: In vitro anticancer evaluation of Enceleamycin A and its underlying mechanism
Source: Royal Society of Chemistry journal article supplement (doi:10.1039/d3ra06204j), 2023-01-01
Supplement: d3ra06204j1.pdf [file d3ra06204j1.pdf]

***Electronic Supplementary Information for***

***In vitro* anticancer evaluation of Enceleamycin A and its underlying  
mechanism**

Abujunaid Khan<sup>ab</sup>, S. Pradeep<sup>ab</sup> and Syed G Dastager<sup>\*ab</sup>

<sup>a</sup> NCIM-Resource Center, Biochemical Sciences Division, CSIR-National Chemical Laboratory, Pune-411008, India;

<sup>b</sup> Academy of Scientific and Innovative Research (AcSIR), Ghaziabad – 201002, India

\*Corresponding E-mail : sg.dastager@ncl.res.in

| Sr. No. | Table of Contents                                        | Page no. |
|---------|----------------------------------------------------------|----------|
| 1.      | Purification and analysis of Enceleamycins               | 3-6      |
| 2.      | Anticancer activity of Enceleamycins                     | 7-11     |
| 3.      | Molecular docking of Enceleamycin A                      | 12-13    |
| 4.      | MD Simulation of docked complex Enceleamycin A and AKT2  | 14       |
| 5.      | <i>In silico</i> ADMET study for Enceleamycin A, B and C | 15-18    |
|         | Reference                                                | 19       |

## 1. Purification and analysis of Enceleamycins

The compounds were isolated from rare Actinobacteria, *Amycolatopsis* sp. MCC 0218. The fermentation was carried out in static condition and crude extract yielded after ethyl acetate extraction was further purified using silica gel column chromatography followed by semi-preparative HPLC. The details of the purification and structural elucidation can be obtained from our previous article.<sup>1</sup>

**HPLC:** The three furo-naphthoquinones named as Enceleamycin A-C and the purified compounds were analysed by analytical U-HPLC Thermo Scientific Ultimate 3000 equipped with a VWD detector using reverse phase C-18 Hypersil GOLD (4.6 × 250 mm, 5 µm particle size, thermoscientific, USA) column with the gradient mobile phase of Milli Q Water and Acetonitrile (ACN). The gradient starts from 5% ACN upto 4 minutes and then it increases upto 95% at 17 minutes and maintained at 95% upto 18 min followed by decrease of ACN to 5% at 21 minute and further maintained at 5% upto 25 minute run with a flow rate of 1 ml/min.

**HR-ESIMS:** HR-ESIMS analysis was carried out on an Agilent 6530 Accurate-Mass Quadrupole Time-of-Flight (Q-TOF) (Agilent, USA) mass spectrometer connected to an HPLC Prime Infinity II 1260 system (800 bar), and a dual electrospray ionization (ESI) source was used for ionization. For LC-based metabolite separation, a Hypersil GOLD C<sub>18</sub> (2.1 × 150 mm, 1.9 µm particle size, Thermo Scientific, USA) column was used at 40 °C with a flow rate of 0.3 mL/min. The metabolites were separated using a 20 min gradient with 100% MS grade water (Solvent A) and 100% MS grade acetonitrile (Solvent B) both containing 0.1% formic acid. The LC method started with 2% B for the first 0.3 min and increased to 30% in the next 2 min. The B% was increased from 30% to 45% till 7 min and further increased to 98% to 16 min at which it was held for the next 1 min. The column was equilibrated to the initial ratio of solvents (98% A: 2% B) in the last 3 min. The MS data was acquired in 2 GHz extended dynamic range. The MS parameters are tuned as; gas temperature 325°C, drying gas 10 L/min, and nebulizer at 35 psi and fragmentor 120 volts.

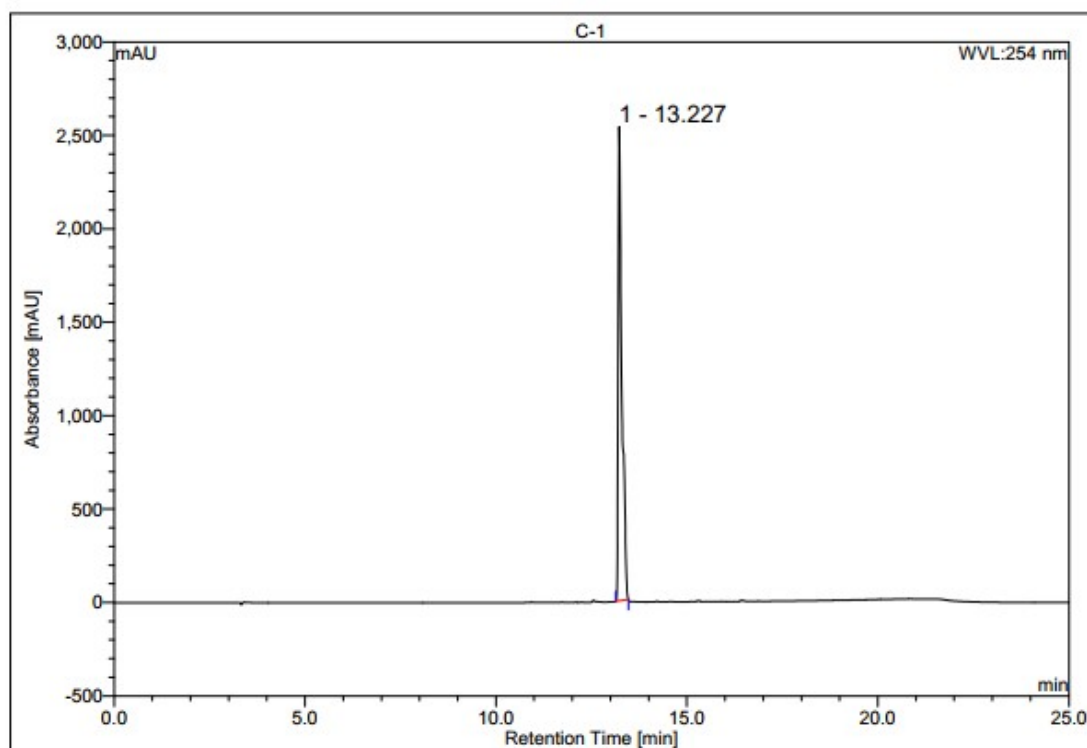

**Fig. S1** HPLC chromatogram of Enceleamycin A (C-1)

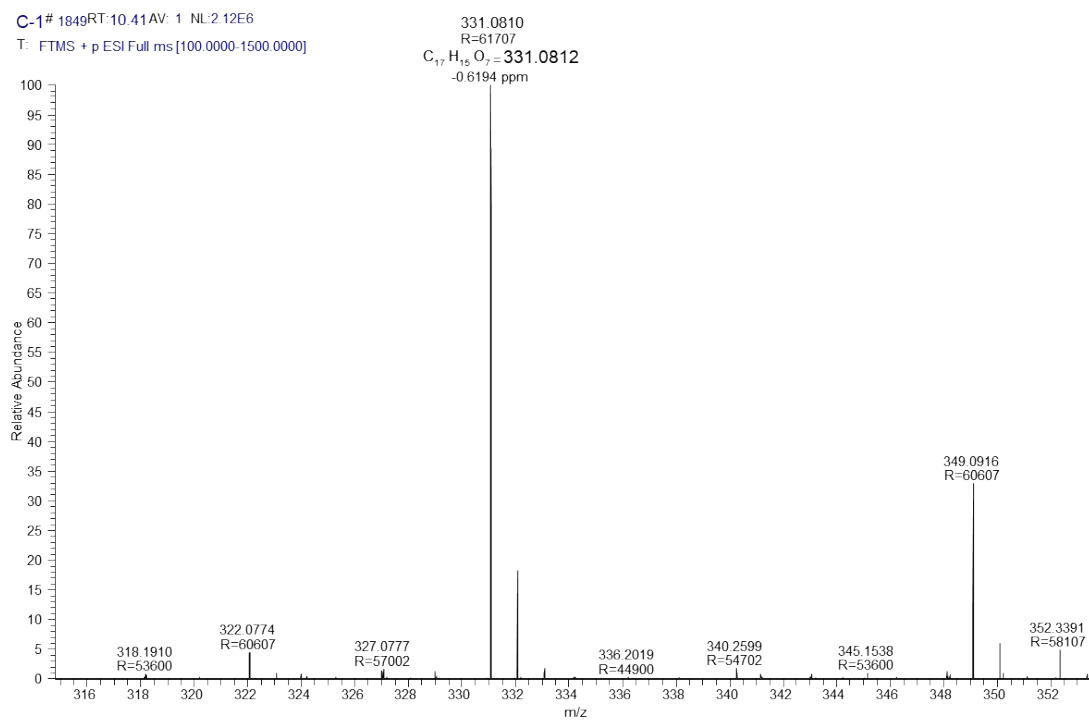

Fig. S2 HR-ESIMS of Enceleamycin A (C-1)

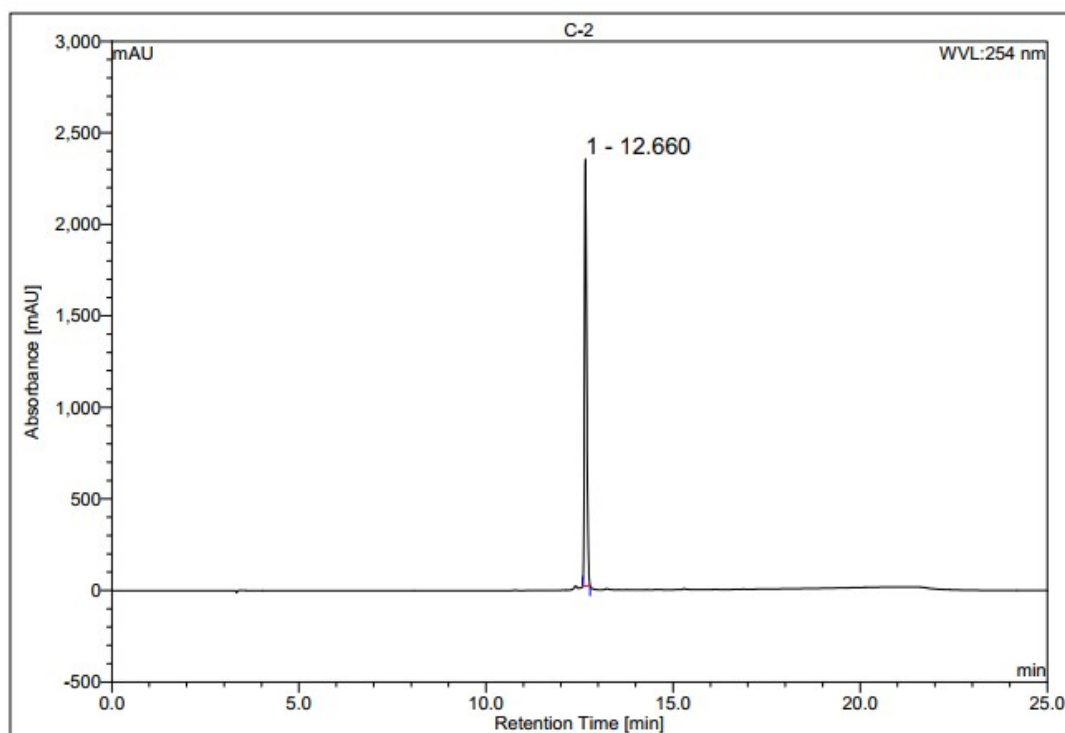

Fig. S3 HPLC chromatogram of Enceleamycin B (C-2)

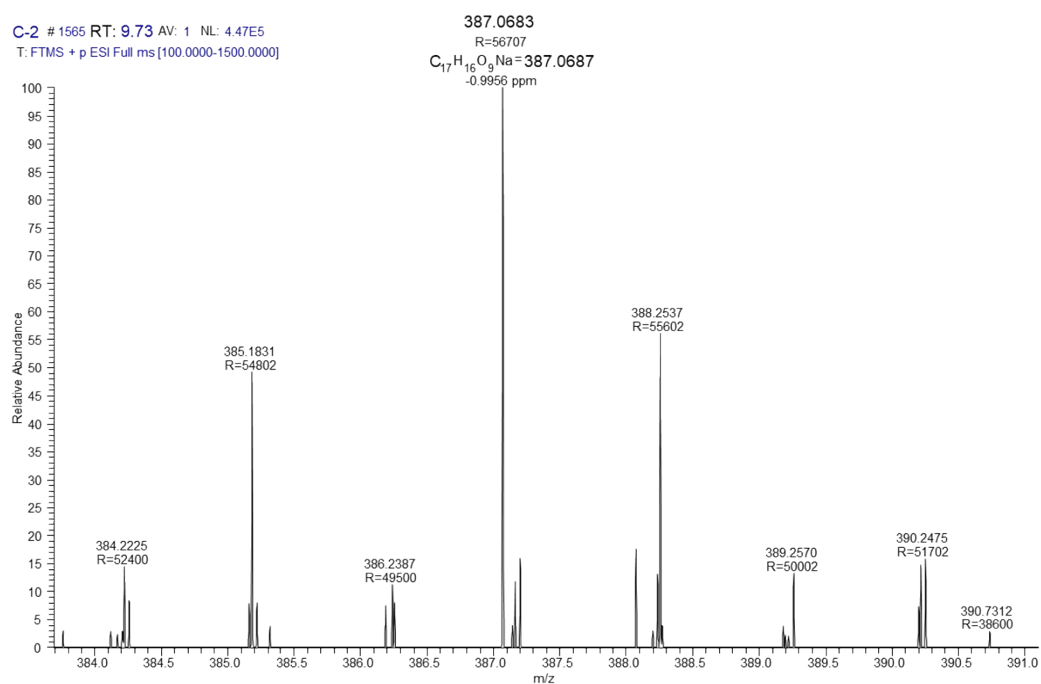

Fig. S4 HR-ESIMS of Enceleamycin B (C-2)

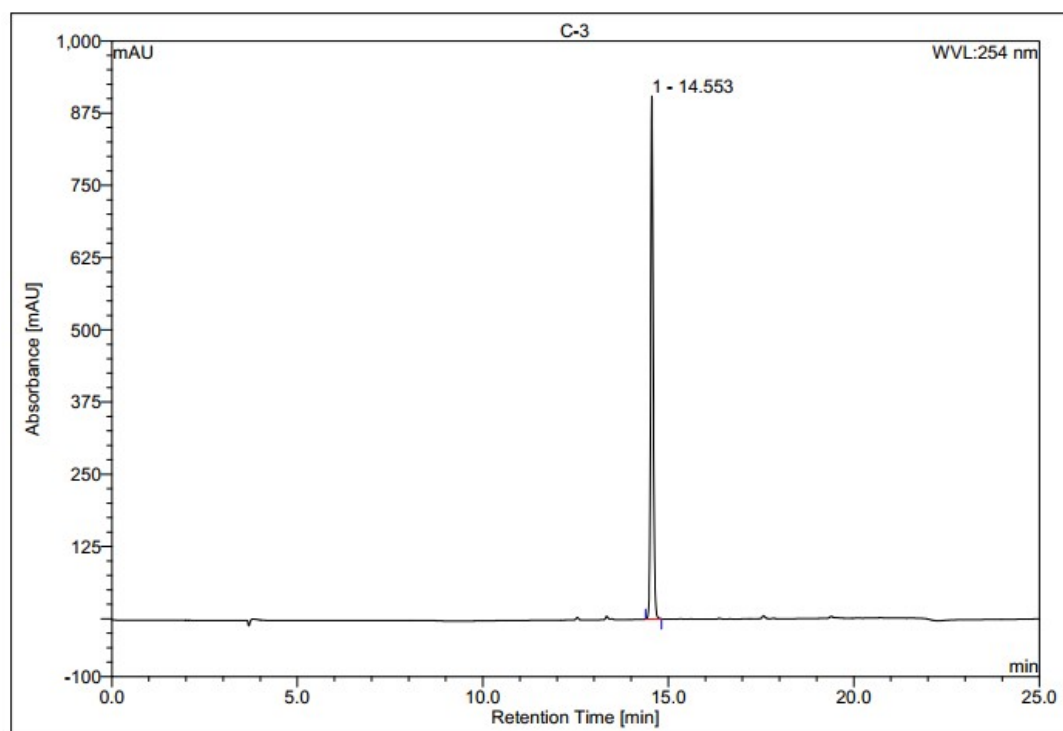

Fig. S5 HPLC chromatogram of Enceleamycin C (C-3)

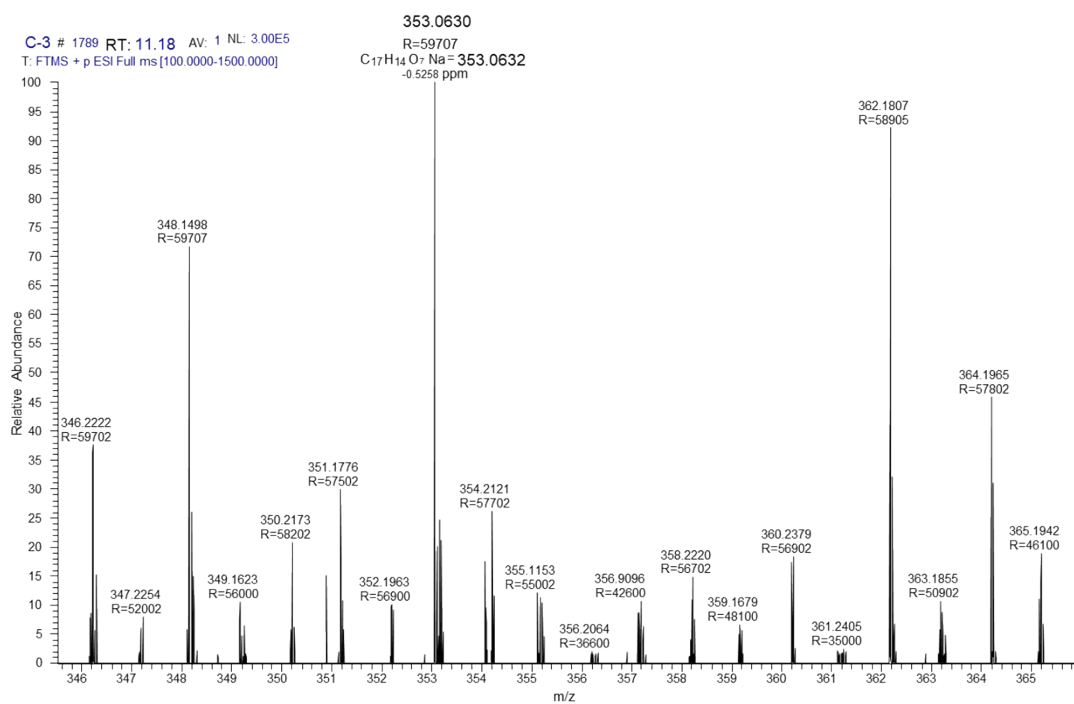

Fig. S6 HR-ESIMS of Enceleamycin C (C-3)

## 2. Anticancer activity of Enceleamycins

### Procedure for Sulforhodamine B (SRB) assay

The cell lines were grown in an appropriate medium containing 10% FBS and 2 mM L-glutamine. For the present screening experiment, 5000 cells/well were inoculated into 96-well microtiter plates. The microtiter plates were incubated at 37° C, 5 % CO<sub>2</sub>, for 24 h before adding experimental drugs.

Experimental drugs were solubilized in an appropriate solvent at 100mg/ml, diluted to 1mg/ml using water, and stored frozen before use. At the time of drug addition, an aliquot of frozen concentrate (1mg/ml) was thawed and diluted to 100 µg/ml with a complete medium containing the test article. Aliquots of 10 µl of these different drug dilutions were added to the appropriate microtiter wells already containing 90 µl of medium, resulting in the required final drug concentrations, i.e..10 µg/ml.

After compound addition, the plates were incubated at standard conditions for 48 hours, and the addition of cold TCA terminated the assay. Cells were fixed *in situ* by gently adding 50 µl of cold 30 % (w/v) TCA (final concentration, 10 % TCA) and incubated for 60 minutes at 4°C. The supernatant was discarded; the plates were washed five times with tap water and air-dried. Sulforhodamine B (SRB) solution (50 µl) at 0.4 % (w/v) in 1 % acetic acid was added to each of the wells, and plates were incubated for 20 minutes at room temperature. After staining, the unbound dye was recovered, and the residual dye was removed by washing five times with 1 % acetic acid. The plates were air-dried. The bound stain was subsequently eluted with 10 mM trizma base, and the absorbance was read on a plate reader at 540 nm with a 690 nm reference wavelength.<sup>1,2</sup>

Percent growth was calculated plate-by-plate for test wells relative to control wells. Percent Growth (GP) was expressed as the ratio of the average absorbance of the test well to the average absorbance of the control wells \* 100.

### Result of Sulforhodamine B (SRB) assay

From the three novel furo-naphthoquinones, Enceleamycin A was isolated in reasonable quantity and used for the *in vitro* anticancer activity by the Anticancer Drug screening facility (ACDSF) at ACTREC, Tata Memorial Centre, Navi Mumbai, India. The anticancer activity was performed by the Sulforhodamine B (SRB) assay at one dose of 10 µg/ml (30.27µM) against nine human cancer cell lines originating from breast, liver, colon, oral, cervical, lung, prostate, ovarian, and leukemia. The data analysis (Table S1) was based on growth percent (GP), where a lower GP value displays a higher growth inhibition percentage (GI%) calculated as (GI% =100-GP). The GP value negative corresponds to lethal activity, whereas the increased negative value corresponds to the higher activity of the tested compound. Enceleamycin A displayed lethal activity against all the cancer cell lines tested and showed maximum cytotoxicity towards the breast cancer cells with a GP value of -90.6, followed by lung cancer. The compound showed better activity than the anticancer drug Adriamycin against most cancer cell lines.

**Table S1.** The percentage growth inhibition (%GI) or lethality of Enceleamycin A and Adriamycin against cancer cell line at 10 µg/ml (30.27µM)

| Human cancer type | Cell line name | Enceleamycin A | Adriamycin |
|-------------------|----------------|----------------|------------|
| Breast            | MCF-7          | -90.6          | -81.3      |
| Liver             | Hep-G2         | -64.6          | -39.1      |
| Colon             | HT-29          | -32.0          | 97.1 a     |
| Oral              | SCC-40         | -32.5          | -73.7      |
| Cervical          | SiHa           | -31.2          | -59.4      |
| Lung              | Hop-62         | -85.5          | 98.9 a     |
| Prostate          | PC-3           | -76.4          | -25.3      |
| Ovarian           | SK-OV-3        | -78.7          | -25.5      |
| Leukemia          | HL-60          | -36.7          | -9.3       |

<sup>a</sup> Percentage growth inhibition (%GI) = 100 - GP (Growth percentage). <sup>b</sup> Negative values correspond to the lethality of the respective cancer cell line.



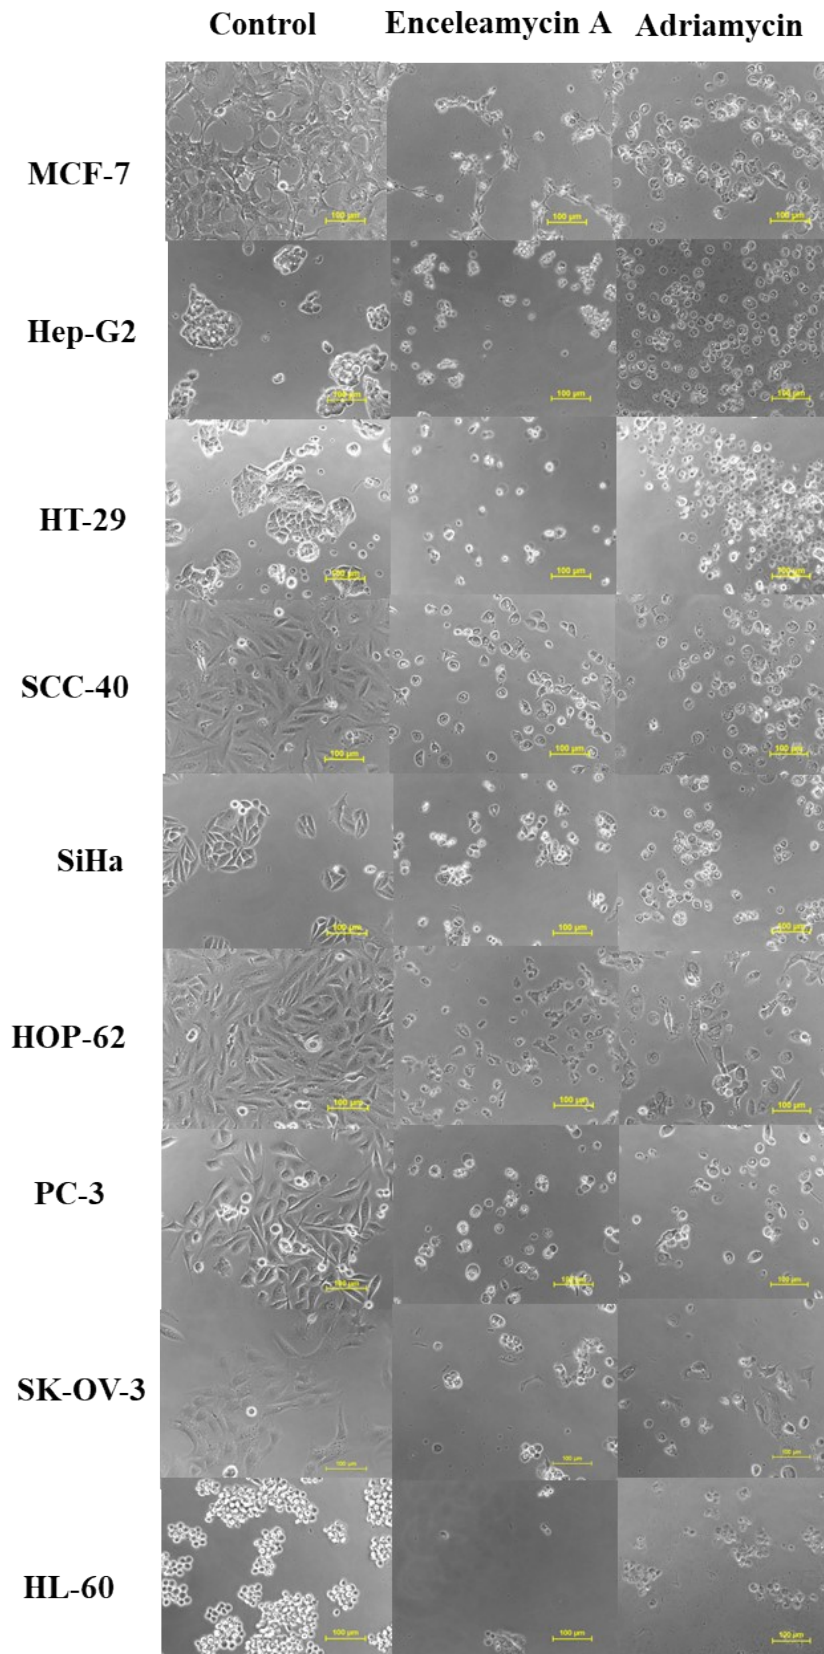

**Fig. S7** Morphological change in various cell lines after treatment with Enceleamycin A and adriamycin at 10  $\mu\text{g/ml}$ .



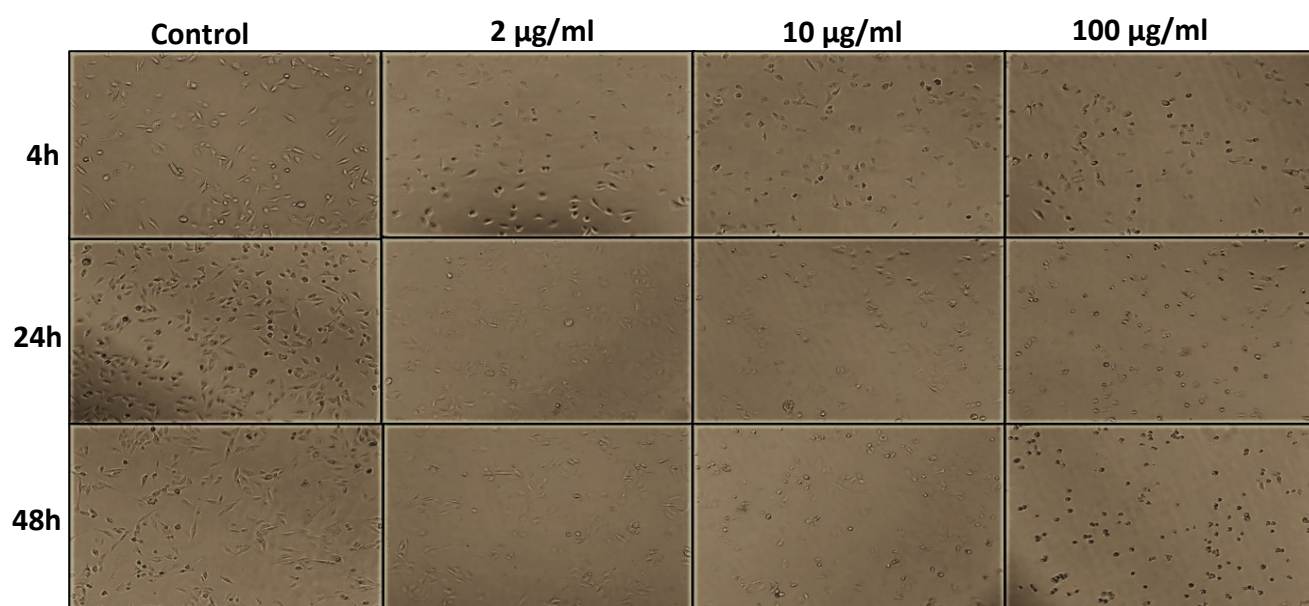

**Fig. S9** Effect of Enceleamycin A on the morphology of MDA-MB-231 cells after treatment at 4h, 24h and 48h

## 2. Molecular docking of Enceleamycin A

### Running AutoGrid and AutoDock

The AutoGrid was executed by providing the AutoGrid executable and GPF files as input and converted to the grid log file (GLG) as the output file. After the successful execution of AutoGrid, the genetic algorithm was set to default and is as follows: i) the number of GA runs 10; ii) population size: 150; iii) the number of energy evaluations: 2.5 million (2.0 Å clustered tolerance) and iv) the number of generations 27000. The Lamarckian genetic algorithm was used, and the output was saved in the docking parameter file (DPF) format. The AutoDock was executed by providing the AutoDock executable and DPF files as input, converted to the docking log file (DLG), and docking was launched. The final DLG file contained essential details, the top ten free binding energy energies for every run, and the inhibitory constant. The results were analyzed and ranked based on their binding energies, saved in PDBQT format; the lowest binding energy complex was saved in PDB format for further analysis.

**Table S3.** Molecular docking of Enceleamycin A with different proteins associated with PI3K-AKT-mTOR pathway

| Receptor PDB ID | Receptor Name | Binding affinity (Kcal/mol) |
|-----------------|---------------|-----------------------------|
| 4TV3            | PI3K $\alpha$ | -6.87                       |
| 3O96            | AKT1          | -6.58                       |
| 1O6L            | AKT2          | <b>-7.14</b>                |
| 1E7U            | mTOR          | -6.65                       |
| 3A62            | S6K1          | -6.34                       |

**Binding Energy = - 7.14 Kcal/mol**

**Ligand Efficiency = - 0.3**

**Inhibitory constant = 5830nM**

**Intermolar energy = - 7.74 Kcal/mol**

**Vander Waal and desolvation energy = - 7.32 Kcal/mol**

**Electrostatic energy = - 0.42 Kcal/mol**

**Total internal energy = 0.46 Kcal/mol**

**Torsional energy = 0.6 Kcal/mol**

**Fig. S10** Conformation of the best molecular fit of Enceleamycin A and AKT2 (PDB ID1O6L)

**Table S4.** RMSD table of Enceleamycin A and the protein AKT2, PDB ID 1O6L

| Cluster Rank | Binding Energy (Kcal/mol) | Cluster RMSD (Å) | Reference RMSD (Å) |
|--------------|---------------------------|------------------|--------------------|
| 1            | -7.14                     | 0                | 105.39             |
| 2            | -7.13                     | 0.1              | 105.39             |
| 3            | -7.13                     | 0.09             | 105.4              |
| 4            | -6.59                     | 0                | 127.31             |
| 5            | -6.26                     | 0                | 111.82             |
| 6            | -6.22                     | 0                | 107.57             |
| 7            | -5.57                     | 0                | 108.9              |
| 8            | -5.42                     | 0                | 138.79             |
| 9            | -5.37                     | 0.22             | 138.76             |
| 10           | -5.34                     | 0                | 126.22             |

**Table S5.** Non-bond interactions between AKT2 protein and Enceleamycin A (EA)

| Name                    | Distance (Å) | Category      | Types                      | From (Donor)    | To (Acceptor)   |
|-------------------------|--------------|---------------|----------------------------|-----------------|-----------------|
| LYS A: 181: HZ1 - EA: O | 2.20784      | Hydrogen Bond | Conventional Hydrogen Bond | LYS A:181: HZ1  | EA: O           |
| EA: H - GLU A: 200: OE1 | 2.04415      | Hydrogen Bond | Conventional Hydrogen Bond | EA: H           | GLU A: 200: OE1 |
| EA: C – GLY A: 295: O   | 3.41985      | Hydrogen Bond | Carbon Hydrogen Bond       | EA: C           | GLY A: 295: O   |
| EA: C – ASP A: 293: OD1 | 3.69348      | Hydrogen Bond | Carbon Hydrogen Bond       | EA: C           | ASP A: 293: OD1 |
| GLU A: 193: OE1 - EA    | 4.00257      | Electrostatic | Pi-Anion                   | GLU A: 193: OE1 | EA              |
| PHE A: 163 - EA         | 3.61776      | Hydrophobic   | Pi-Pi Stacked              | PHE A: 163      | EA              |
| EA:C – LEU A: 183       | 4.55503      | Hydrophobic   | Alkyl                      | EA: C           | LEU A: 183      |
| EA – LYS A: 191         | 5.27434      | Hydrophobic   | Pi-Alkyl                   | EA              | LYS A: 191      |

### 3. MD Simulation of docked complex Enceleamycin A and AKT2

**Table S6.** MM-PBSA assessment giving the free energy calculations from the MD simulation.

| Energy summary         | Values (Kcal/mol)   |
|------------------------|---------------------|
| van der Waal energy    | -32.672 $\pm$ 3.159 |
| Electrostatic energy   | -24.456 $\pm$ 2.752 |
| Polar solvation energy | 50.566 $\pm$ 3.774  |
| SASA energy            | -3.919 $\pm$ 0.252  |
| SAV energy             | 0.00                |
| WCA energy             | 0.00                |
| Binding energy         | -10.481 $\pm$ 3.398 |

#### 4. *In silico* ADMET study for Enceleamycin A, B and C

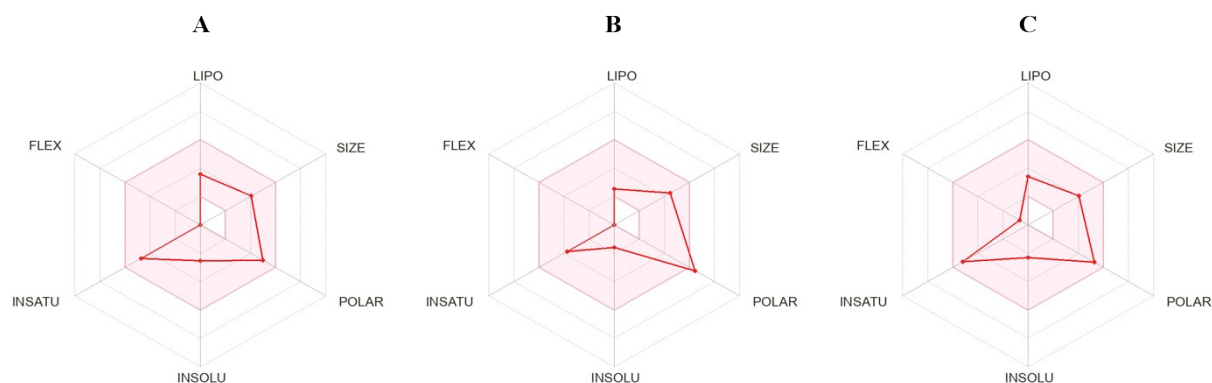

**Fig. S11** Bioavailability radar of Enceleamycin A, B and C by SwissADME. Enceleamycin A and C follow the recommended physicochemical properties for bioavailability in all the aspects whereas Enceleamycin B overrules only the polarity criteria.

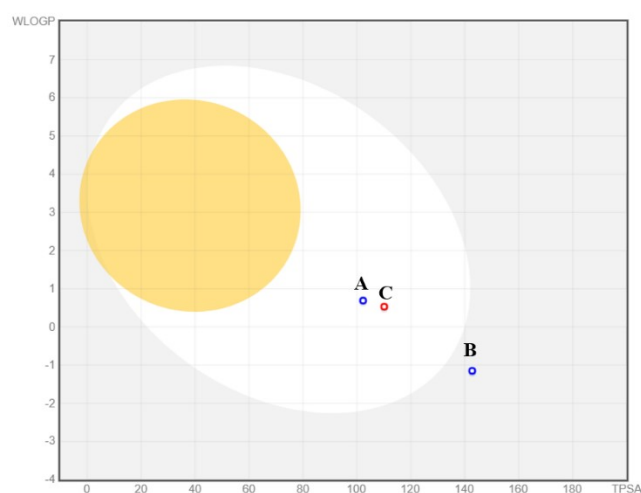

**Fig. S12** Boiled egg ADME prediction of Enceleamycin A, B and C by SwissADME. Enceleamycin A and C displaying good GI-absorption whereas Enceleamycin B possess low GI-absorption. All the three molecules are non-permeable to BBB. Enceleamycin B displaying slightly higher TPSA value than recommended.

**Table S7.** Physicochemical properties of Enceleamycins A-C by SwissADME

| Physicochemical properties  | Enceleamycin A                                 | Enceleamycin B                                 | Enceleamycin C                                 |
|-----------------------------|------------------------------------------------|------------------------------------------------|------------------------------------------------|
| Formula                     | C <sub>17</sub> H <sub>14</sub> O <sub>7</sub> | C <sub>17</sub> H <sub>16</sub> O <sub>9</sub> | C <sub>17</sub> H <sub>14</sub> O <sub>7</sub> |
| Molecular weight            | 330.29 g/mol                                   | 364.30 g/mol                                   | 330.29 g/mol                                   |
| Number heavy atoms          | 24                                             | 26                                             | 24                                             |
| Number aromatic heavy atoms | 6                                              | 6                                              | 6                                              |
| Fraction Csp3               | 0.41                                           | 0.53                                           | 0.35                                           |
| Number of rotatable bonds   | 0                                              | 0                                              | 1                                              |
| Number H-bond acceptors     | 7                                              | 9                                              | 7                                              |
| Number H-bond donors        | 2                                              | 4                                              | 2                                              |
| Molar Refractivity          | 78.07                                          | 80.94                                          | 79.29                                          |
| TPSA                        | 102.29 Å <sup>2</sup>                          | 142.75 Å <sup>2</sup>                          | 110.13 Å <sup>2</sup>                          |

**Table S8.** Lipophilicity properties of Enceleamycins A-C by SwissADME

| Lipophilicity                            | Enceleamycin A | Enceleamycin B | Enceleamycin C |
|------------------------------------------|----------------|----------------|----------------|
| Log <i>P</i> <sub>o/w</sub> (iLOGP)      | 2.05           | 1.26           | 1.67           |
| Log <i>P</i> <sub>o/w</sub> (XLOGP3)     | 0.74           | -1.06          | 0.46           |
| Log <i>P</i> <sub>o/w</sub> (WLOGP)      | 0.69           | -1.15          | 0.53           |
| Log <i>P</i> <sub>o/w</sub> (MLOGP)      | -0.73          | -1.81          | -1.21          |
| Log <i>P</i> <sub>o/w</sub> (SILICOS-IT) | 1.41           | 0.03           | 1.76           |
| Consensus Log <i>P</i> <sub>o/w</sub>    | 0.83           | -0.54          | 0.64           |

**Table S9.** Water solubility properties of Enceleamycins A-C by SwissADME

| Water Solubility          | Enceleamycin A | Enceleamycin B | Enceleamycin C |
|---------------------------|----------------|----------------|----------------|
| Log <i>S</i> (ESOL)       | -2.54          | -1.60          | -2.30          |
| Class                     | Soluble        | Very soluble   | Soluble        |
| Log <i>S</i> (Ali)        | -2.47          | -1.45          | -2.34          |
| Class                     | Soluble        | Very soluble   | Soluble        |
| Log <i>S</i> (SILICOS-IT) | -2.73          | -1.57          | -2.90          |
| Class                     | Soluble        | Soluble        | Soluble        |



**Table S10.** Pharmacokinetics of Enceleamycins A-C by SwissADME

| Pharmacokinetics            | Enceleamycin A | Enceleamycin B | Enceleamycin C |
|-----------------------------|----------------|----------------|----------------|
| GI absorption               | High           | Low            | High           |
| BBB permeant                | No             | No             | No             |
| P-gp substrate              | Yes            | Yes            | No             |
| CYP1A2 inhibitor            | No             | No             | No             |
| CYP2C19 inhibitor           | No             | No             | No             |
| CYP2C9 inhibitor            | No             | No             | No             |
| CYP2D6 inhibitor            | No             | No             | No             |
| CYP3A4 inhibitor            | No             | No             | No             |
| Log $K_p$ (skin permeation) | -7.79 cm/s     | -9.27 cm/s     | -7.99 cm/s     |

**Table S11.** Druglikeness of Enceleamycins A-C by SwissADME

| Druglikeness          | Enceleamycin A   | Enceleamycin B              | Enceleamycin C   |
|-----------------------|------------------|-----------------------------|------------------|
| Lipinski              | Yes; 0 violation | Yes; 0 violation            | Yes; 0 violation |
| Veber                 | Yes              | No; 1 violation: TPSA>140   | Yes              |
| Ghose                 | Yes              | No; 1 violation: WLOGP<-0.4 | Yes              |
| Egan                  | Yes              | No; 1 violation: TPSA>131.6 | Yes              |
| Muegge                | Yes              | Yes                         | Yes              |
| Bioavailability Score | 0.56             | 0.55                        | 0.56             |

**Table S12.** Medicinal chemistry properties of Enceleamycins A-C by SwissADME

| Medicinal Chemistry     | Enceleamycin A     | Enceleamycin B           | Enceleamycin C     |
|-------------------------|--------------------|--------------------------|--------------------|
| PAINS                   | 1 alert: quinone_A | 1 alert: keto_keto_gamma | 1 alert: quinone_A |
| Brenk                   | 0 alert            | 0 alert                  | 1 alert: aldehyde  |
| Leadlikeness            | Yes                | No; 1 violation: MW>350  | Yes                |
| Synthetic accessibility | 4.84               | 4.76                     | 4.64               |

**Table S13.** ADMET prediction profile of Enceleamycins A-C by the pkCSM webtool

| Property            | Model Name                        | Enceleamycin A | Enceleamycin B | Enceleamycin C | Unit                                        |
|---------------------|-----------------------------------|----------------|----------------|----------------|---------------------------------------------|
| <b>Absorption</b>   | Water solubility                  | -2.858         | -3.088         | -2.537         | Numeric (log mol/L)                         |
| <b>Absorption</b>   | Caco2 permeability                | 1.093          | 0.662          | 0.73           | Numeric (log Papp in 10 <sup>-6</sup> cm/s) |
| <b>Absorption</b>   | Intestinal absorption (human)     | 53.49          | 50.508         | 75.909         | Numeric (% Absorbed)                        |
| <b>Absorption</b>   | Skin Permeability                 | -2.719         | -2.738         | -3.148         | Numeric (log Kp)                            |
| <b>Absorption</b>   | P-glycoprotein substrate          | Yes            | Yes            | Yes            | Categorical (Yes/No)                        |
| <b>Absorption</b>   | P-glycoprotein I inhibitor        | No             | No             | No             | Categorical (Yes/No)                        |
| <b>Absorption</b>   | P-glycoprotein II inhibitor       | No             | No             | No             | Categorical (Yes/No)                        |
| <b>Distribution</b> | VDss (human)                      | -0.839         | 0.471          | 0.041          | Numeric (log L/kg)                          |
| <b>Distribution</b> | Fraction unbound (human)          | 0.248          | 0.324          | 0.336          | Numeric (Fu)                                |
| <b>Distribution</b> | BBB permeability                  | -0.423         | -1.27          | -0.146         | Numeric (log BB)                            |
| <b>Distribution</b> | CNS permeability                  | -2.943         | -3.581         | -3.451         | Numeric (log PS)                            |
| <b>Metabolism</b>   | CYP2D6 substrate                  | Yes            | No             | No             | Categorical (Yes/No)                        |
| <b>Metabolism</b>   | CYP3A4 substrate                  | No             | No             | No             | Categorical (Yes/No)                        |
| <b>Metabolism</b>   | CYP1A2 inhibitor                  | No             | No             | No             | Categorical (Yes/No)                        |
| <b>Metabolism</b>   | CYP2C19 inhibitor                 | No             | No             | No             | Categorical (Yes/No)                        |
| <b>Metabolism</b>   | CYP2C9 inhibitor                  | No             | No             | No             | Categorical (Yes/No)                        |
| <b>Metabolism</b>   | CYP2D6 inhibitor                  | No             | No             | No             | Categorical (Yes/No)                        |
| <b>Metabolism</b>   | CYP3A4 inhibitor                  | No             | No             | No             | Categorical (Yes/No)                        |
| <b>Excretion</b>    | Total Clearance                   | 1.231          | 0.724          | -0.13          | Numeric (log ml/min/kg)                     |
| <b>Excretion</b>    | Renal OCT2 substrate              | No             | No             | No             | Categorical (Yes/No)                        |
| <b>Toxicity</b>     | AMES toxicity                     | No             | No             | No             | Categorical (Yes/No)                        |
| <b>Toxicity</b>     | Max. tolerated dose (human)       | 0.689          | 0.217          | -0.056         | Numeric (log mg/kg/day)                     |
| <b>Toxicity</b>     | hERG I inhibitor                  | No             | No             | No             | Categorical (Yes/No)                        |
| <b>Toxicity</b>     | hERG II inhibitor                 | No             | No             | No             | Categorical (Yes/No)                        |
| <b>Toxicity</b>     | Oral Rat Acute Toxicity (LD50)    | 2.478          | 3.364          | 2.738          | Numeric (mol/kg)                            |
| <b>Toxicity</b>     | Oral Rat Chronic Toxicity (LOAEL) | 1.932          | 3.274          | 1.819          | Numeric (log mg/kg_bw/day)                  |
| <b>Toxicity</b>     | Hepatotoxicity                    | No             | No             | No             | Categorical (Yes/No)                        |
| <b>Toxicity</b>     | Skin Sensitisation                | No             | No             | No             | Categorical (Yes/No)                        |
| <b>Toxicity</b>     | T.Pyriformis toxicity             | 0.205          | 0.285          | 0.3            | Numeric (log ug/L)                          |
| <b>Toxicity</b>     | Minnow toxicity                   | 1.97           | 3.596          | 2.005          | Numeric (log mM)                            |

**Reference:**

1. A. Khan, M. S. Said, B. R. Borade, R. Gonnade, V. Barvkar, R. Kontham and S. G. Dastager, *J. Nat. Prods.*, 2022, 85, 1267-1273.
2. V. Vichai and K. Kirtikara. *Nat. Protoc.*, 2006, **1** , 1112–1116.
3. J. Kode, J. Kovvuri, B. Nagaraju, S. Jadhav, M. Barkume, S. Sen, N. K. Kasinathan, P. Chaudhari, B. S. Mohanty, J. Gour, D. K. Sigalapalli, C. G. Kumar, T. Pradhan, M. Banerjee and A. Kamal. *Bioorg. Chem.*, 2020, **105** , 104447.
